# Supplementary material
Source: Springer Nature journal article supplement (https://www.springermedizin.de/resource/supplementary/12936_2008_619_MOESM2_ESM.pdf/9547836)

# OR-I Region

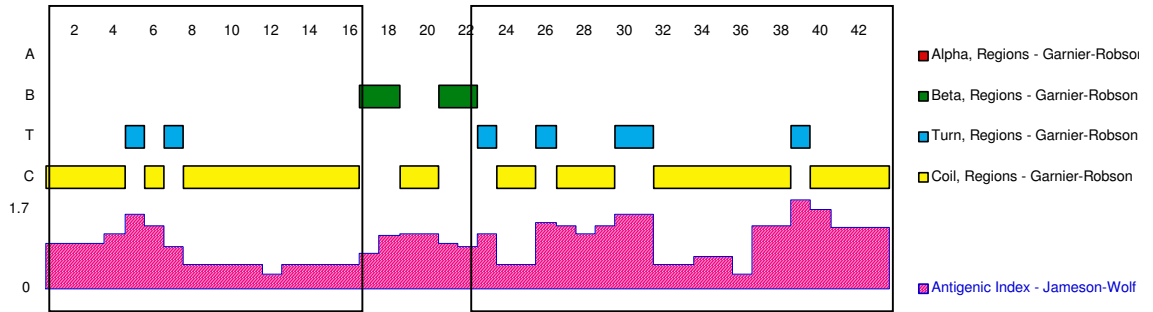

-1.7

# OR-II Region

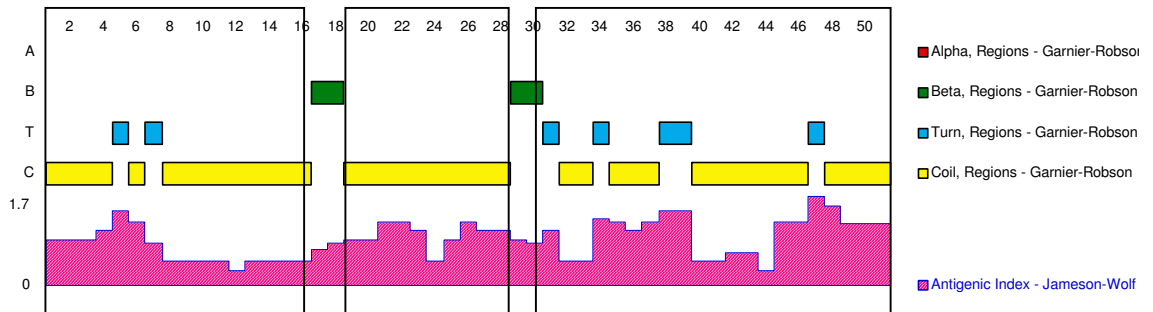

-1.7

Supplement: MOESM2 [file 9547836]
